# Supplementary material for: Identification and Functional Analysis of Two Novel Genes—Geranylgeranyl Pyrophosphate Synthase Gene (AlGGPPS) and Isopentenyl Pyrophosphate Isomerase Gene (AlIDI)—from Aurantiochytrium limacinum Significantly Enhance De Novo β-Carotene Biosynthesis in Escherichia coli
Source: MDPI journal article supplement (doi:10.3390/md21040249), 2023-04-17
Supplement: s1 [file s1]

## Supplementary Materials

### **Identification and Functional Analysis of Two Novel Genes—Geranylgeranyl Pyrophosphate Synthase Gene (*AlGGPPS*) and Isopentenyl Pyrophosphate Isomerase Gene (*AlIDI*)—from *Aurantiochytrium limacinum* Significantly Enhance De Novo $\beta$ -carotene Biosynthesis in *Escherichia coli***

Shitao Shi <sup>1</sup>, Yi Chang <sup>2</sup>, Jinhui Yu <sup>3</sup>, Hui, Chen <sup>2</sup>, Qiang Wang <sup>2,\*</sup> and

Yuping Bi <sup>1,3,\*</sup>

<sup>1</sup> School of Life Sciences, Shandong University, Qingdao, Shandong 266237, China

<sup>2</sup> State Key Laboratory of Crop Stress Adaptation and Improvement, School of Life Sciences, Henan University, Kaifeng 475004, China

<sup>3</sup> Institute of Crop Germplasm Resources, Shandong Academy of Agricultural Sciences, Jinan, Shandong 250100, China

\* Correspondence: wangqiang@henu.edu.cn (Q. Wang);

yuping\_bi@hotmail.com (Y. Bi)

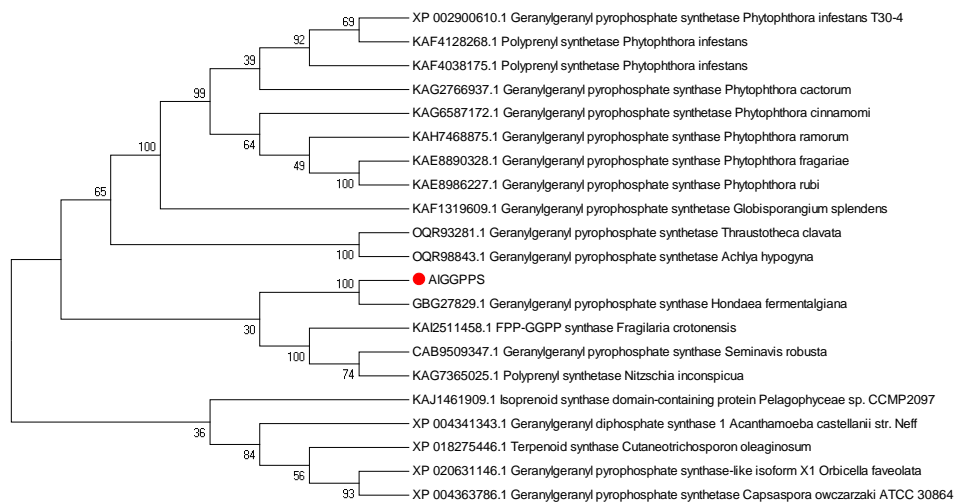

(a)

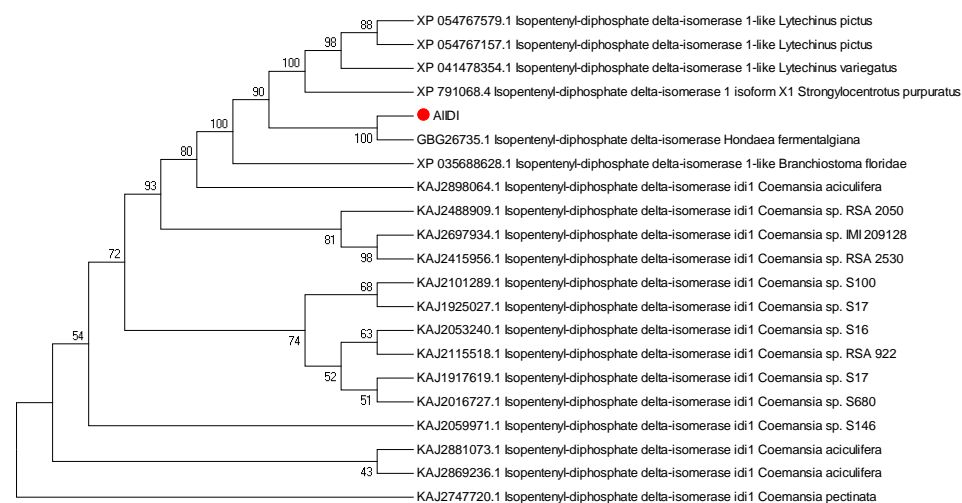

(b)

**Figure S1.** Phylogenetic analysis of AIGGPPS (a) and AIIDI (b).

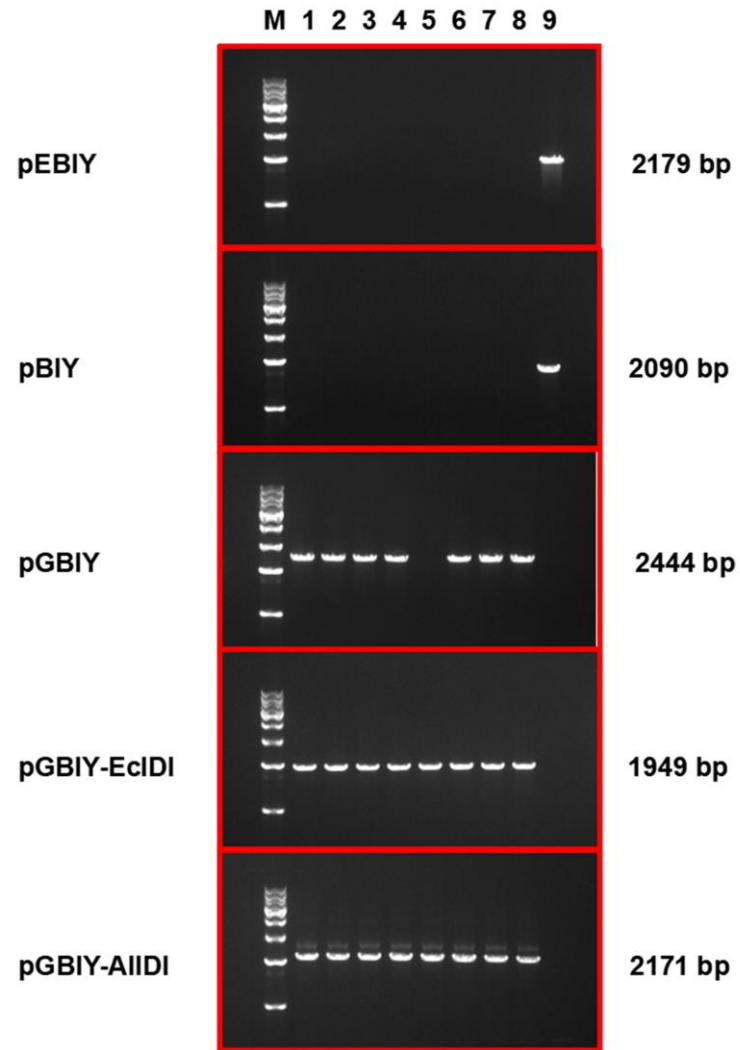

**Figure S2.** Amplification and verification of structured plasmids. pEBIY: M, 1k-10k marker; Lane 1-8, eight pEBIY transformants as the template; Lane 9, plasmid pACCAR16 $\Delta$ crtX as the template; primer pairs P1/P2 were used. pBIY: M,

1k-10k marker; Lane 1-8, eight pBIY transformants as the template; Lane 9, plasmid pEBIY as the template; primer pairs P1/P3 were used. pGBIY: M, 1k-10k marker; Lane 1-8, eight pGBIY transformants as the template; Lane 9, plasmid pBIY as the template; primer pairs P4/P3 were used. pGBIY-EcIDI: M, 1k-10k marker; Lane 1-8, eight pGBIY-EcIDI transformants as the template; Lane 9, plasmid pGBIY as the template; primer pairs P6/P8 were used. pGBIY-AlIDI: M, 1k-10k marker; Lane 1-8, eight pGBIY-AlIDI transformants as the template; Lane 9, plasmid pGBIY as the template; primer pairs P6/P10 were used.
